# Supplementary material for: Inferring Geographic Coordinates of Origin for Europeans Using Small Panels of Ancestry Informative Markers
Source: PubMed Central journal article supplement (PMC2923600; doi:10.1371/journal.pone.0011892), 2010-08-18
Supplement: pone.0011892.s002.pdf [file pone.0011892.s002.pdf]

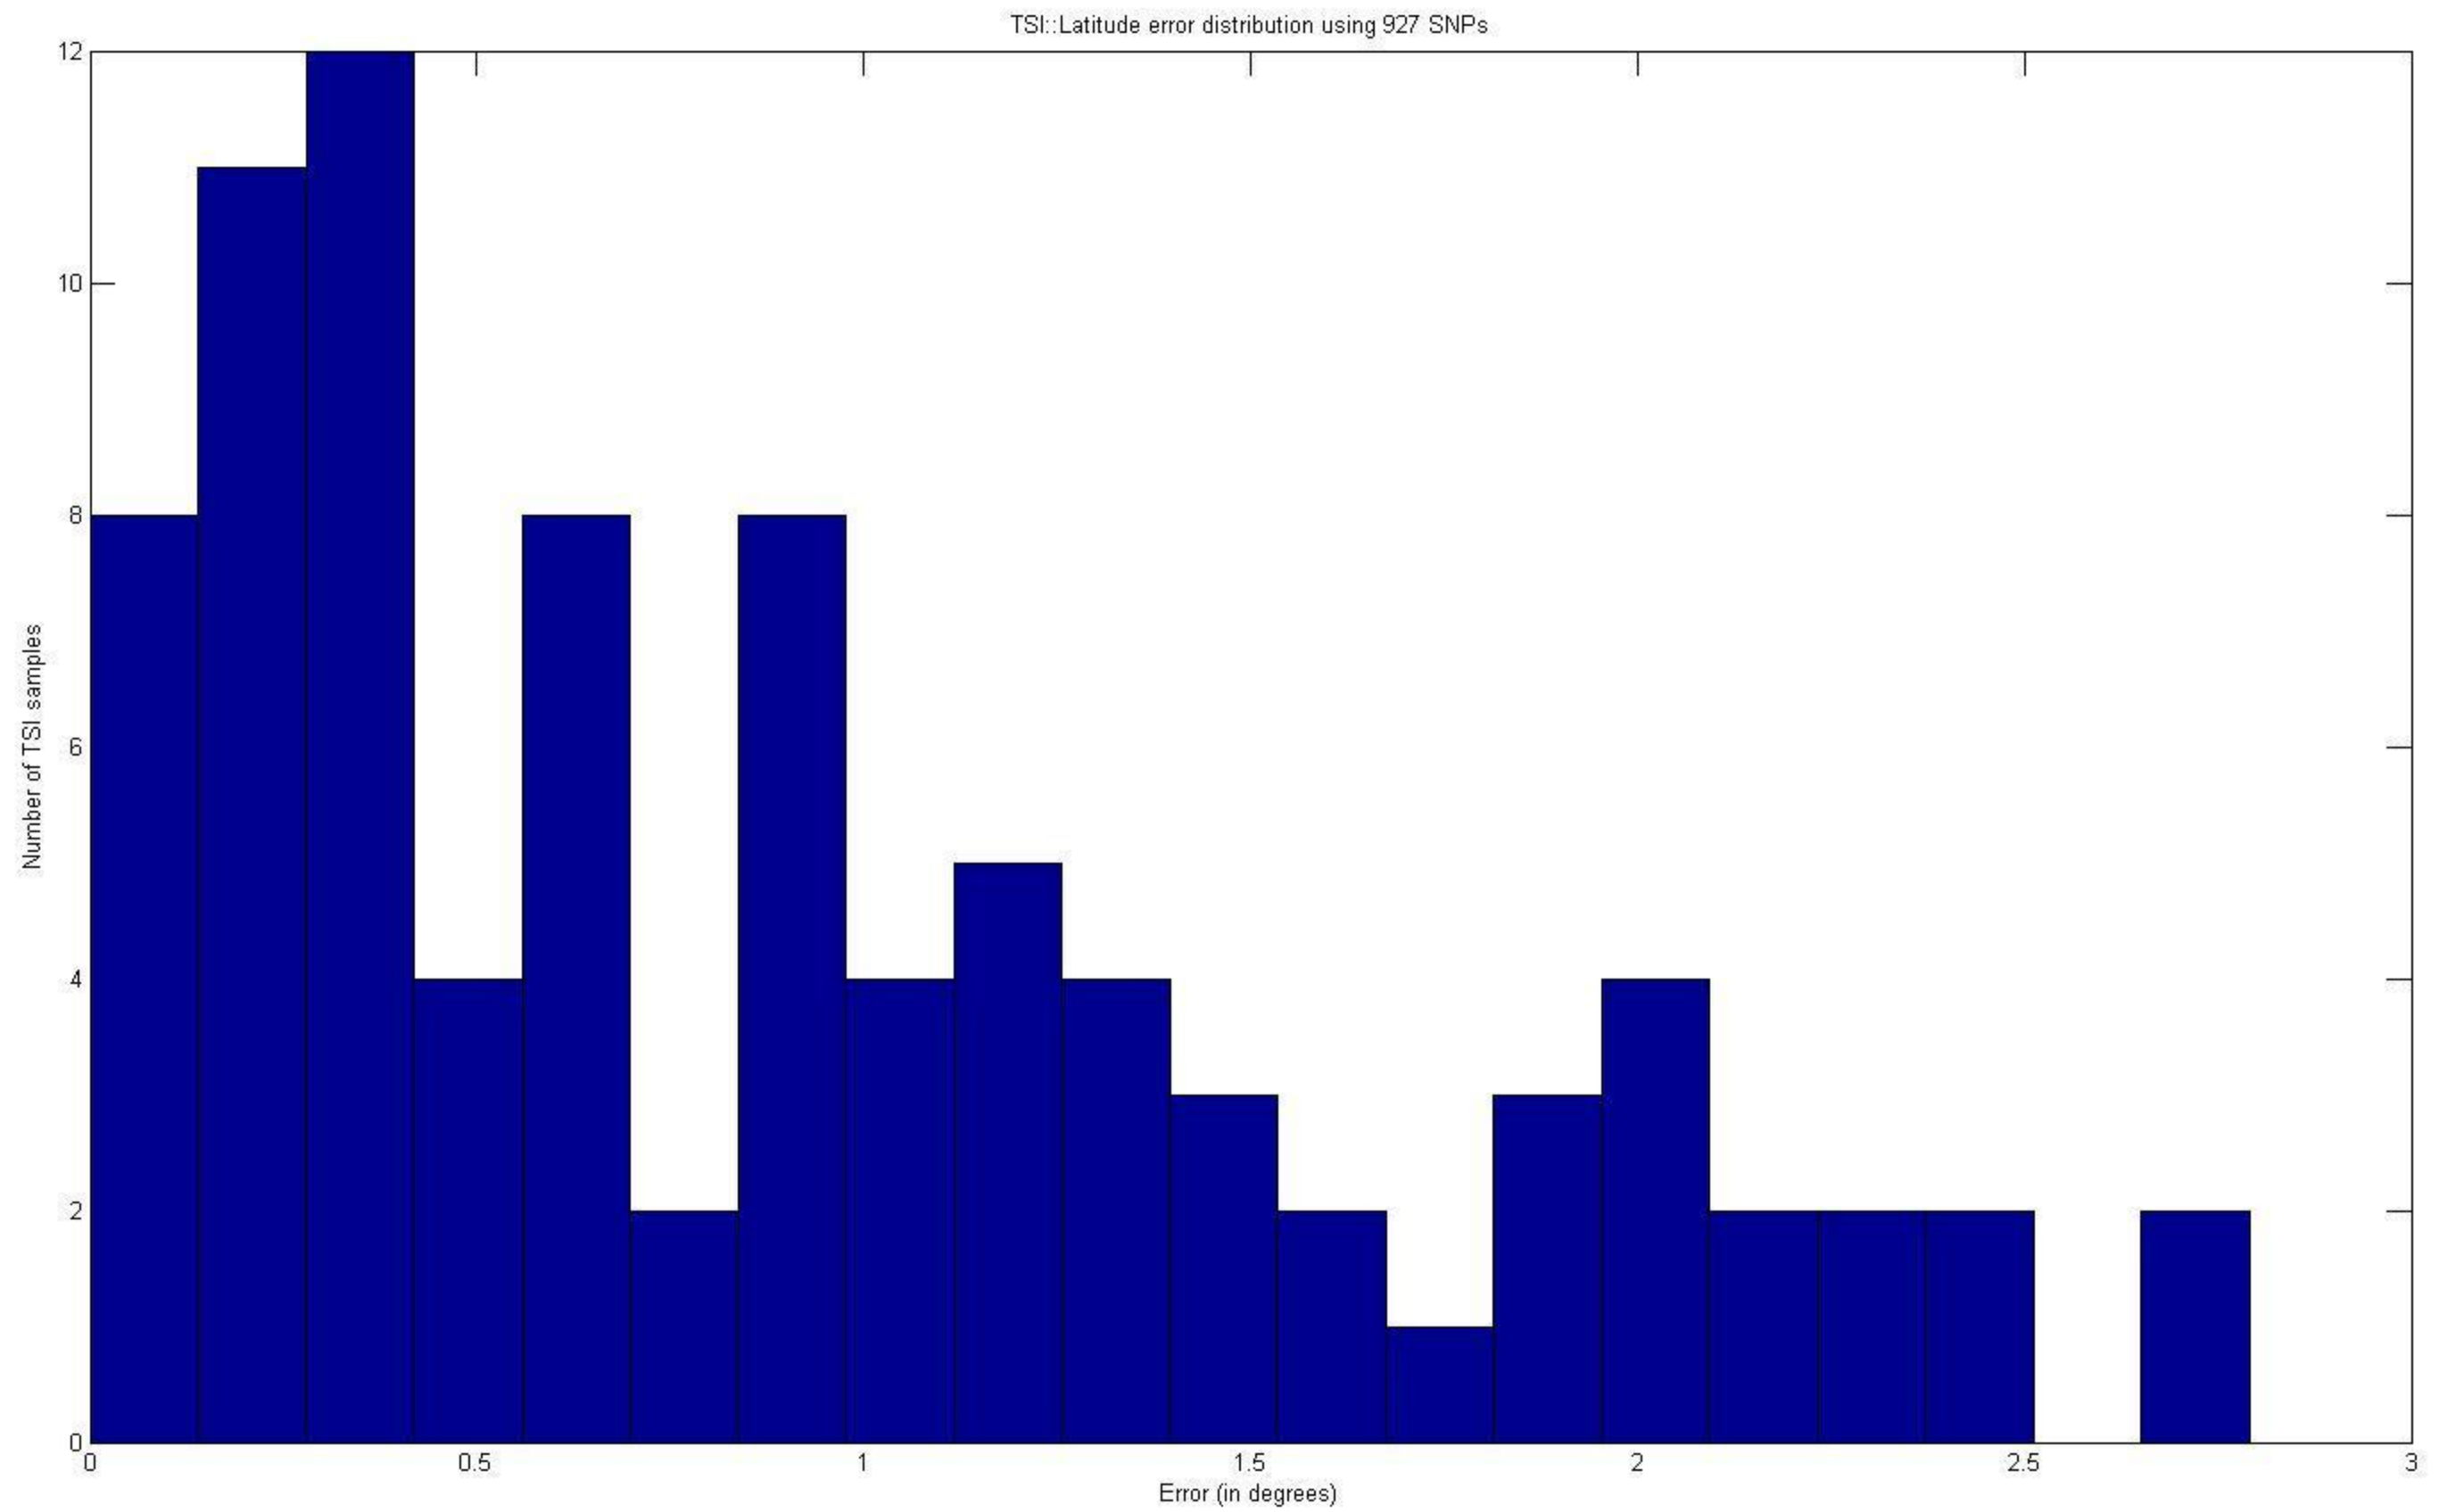

**Supplementary Figure 2A**

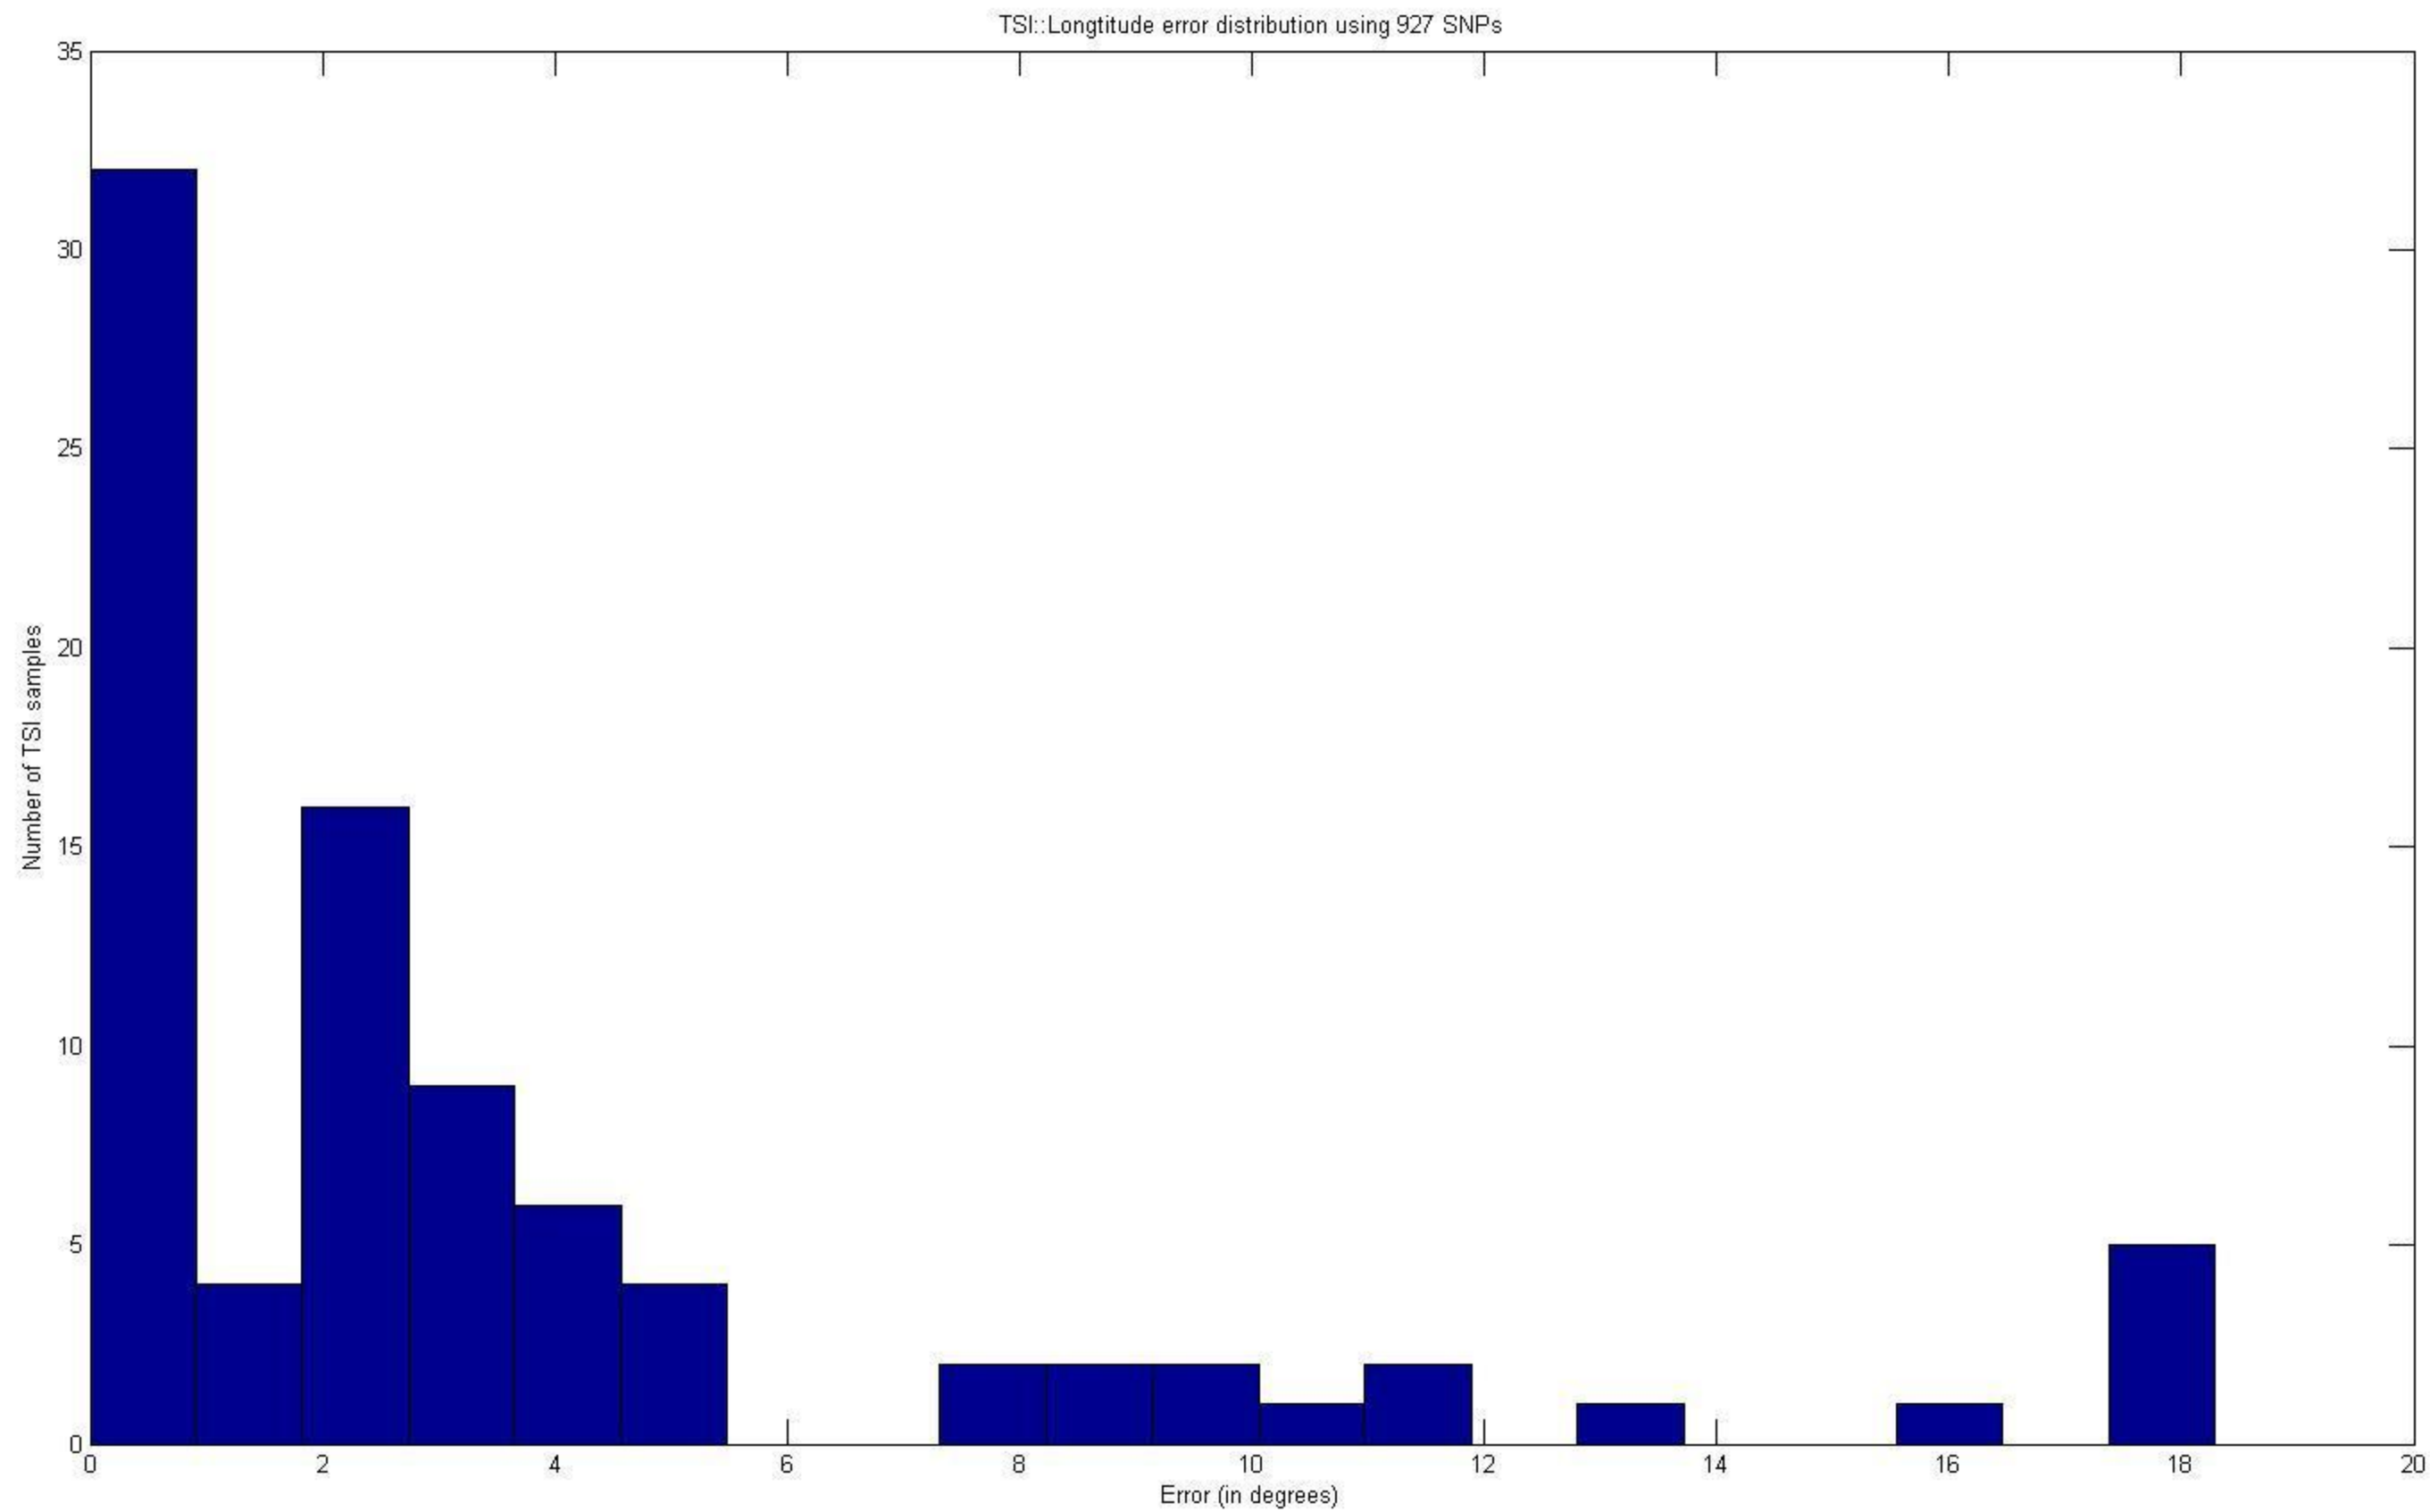

**Supplementary Figure 2B**
